# Supplementary material for: Modulation of the magnetic dynamics of pentagonal-bipyramidal Co(ii) complexes by fine-tuning the coordination microenvironment
Source: Royal Society of Chemistry journal article supplement (doi:10.1039/d2dt02345h), 2022-01-01
Supplement: d2dt02345h1.pdf [file d2dt02345h1.pdf]

## Supporting Information

### **Modulation of the magnetic dynamics of pentagonal-bipyramidal Co(II) complexes by fine-tuning of the coordination microenvironment**

Yuanyuan Qin,<sup>a‡</sup> Yuewei Wu,<sup>a‡</sup> Shuchang Luo,<sup>\*b</sup> Jing Xi,<sup>a</sup> Yan Guo,<sup>a</sup> Yi Ding,<sup>a</sup> Jun Zhang<sup>a</sup> and Xiangyu Liu<sup>\*a</sup>

<sup>a</sup> State Key Laboratory of High-efficiency Utilization of Coal and Green Chemical Engineering, College of Chemistry and Chemical Engineering, Ningxia University, Yinchuan 750021, China. E-mail: xiangyuli432@126.com

<sup>b</sup> College of Chemical Engineering, Guizhou University of Engineering Science, Bijie 551700, China. E-mail: luosc@gues.edu.cn

‡ These authors contributed equally to this work.

**\*Corresponding author**

**Dr. Xiangyu Liu**

**E-mail: xiangyuli432@126.com**

**\*Corresponding author**

**Prof. Shuchang Luo**

**E-mail: luosc@gues.edu.cn**

## Contents:

**Table S1.** Selected crystallographic data and structure refinement for complexes **1-4**.

**Table S2.** Selected Bond Lengths (Å) and Bond Angles (°) for **1-4**.

**Table S3.** Hydrogen-bonded parameters /Å, ° for complexes **1-3**.

**Table S4.** Co (III) ions geometry analysis of **1-4** by SHAPE 2.1 software.

**Table S5.** Relaxation fitting parameters from least-squares fitting of  $\chi(f)$  data under 2000 Oe dc field of **1**.

**Table S6.** Relaxation fitting parameters from least-squares fitting of  $\chi(f)$  data under 2000 Oe dc field of **2**.

**Table S7.** Relaxation fitting parameters from least-squares fitting of  $\chi(f)$  data under 2000 Oe dc field of **4**.

**Table S8.** The CASSCF/NEVPT2/def2-TZVP(-f) computed Individual contributions to *D*-tensor for complexes.

**Table S9.** Energy levels (cm<sup>-1</sup>) of ligand field multiplets in zero field derived from CASSCF/def2-TZVP(-f) computed for complexes.

**Table S10.** Structural and magnetic parameters for the reported pentagonal-bipyramidal Co(II) complexes.

**Fig. S1** 1D chains formed via intermolecular hydrogen bonds and packing crystal structures of **1**.

**Fig. S2** 1D chains formed via intermolecular hydrogen bonds along the b-axis(a) and packing crystal structures, 1D chains formed via intermolecular hydrogen bonds along the c-axis (b) of **2**.

**Fig. S3** 1D chains formed via intermolecular hydrogen bonds and packing crystal structures of **3**.

**Fig. S4** The packing crystal structures of **4**.

**Fig. S5** PXRD patterns for complexes **1(a)**, **2(b)**, **3(c)**, **4(d)**.

**Fig. S6** Plots of  $M$  vs  $H/T$  for **1-4** at different temperatures.

**Fig. S7** Temperature dependence of the in-phase ( $\chi'$ ) and out-phase ( $\chi''$ ) ac magnetic susceptibility at 1000 Hz without static field for **1-4**.

**Fig. S8** Temperature dependence of the in-phase (top) and out-phase (bottom) ac susceptibilities at different frequencies with a dc field of 2000 Oe for complexes **1(a)**, **2(b)** and **4(c)**.

**Fig. S9** Frequency dependence of the in-phase ac susceptibility signals for complexes **1(a)**, **2(b)** and **4(c)** under a 2000 Oe dc field.

**Fig. S10** Cole-Cole plots under 2000 Oe for **1**. The solid lines show the best fitting according to the generalized Debye model.

**Fig. S11** Cole-Cole plots under 2000 Oe for **2(a)** and **4(b)**. The solid lines show the best fitting according to the generalized Debye model.

**Fig. S12** Calculated complete structure of complexes **1-4**.

**Fig. S13** The molecular structure for **1 (a)** and **2 (b)**.

**Table S1** Selected crystallographic data and structure refinement for complexes **1-4**.

| complex                                              | <b>1</b>                                                          | <b>2</b>                                                          | <b>3</b>                                                          | <b>4</b>                                                          |
|------------------------------------------------------|-------------------------------------------------------------------|-------------------------------------------------------------------|-------------------------------------------------------------------|-------------------------------------------------------------------|
| Empirical formula                                    | C <sub>24</sub> H <sub>25</sub> CoN <sub>5</sub> O <sub>4</sub>   | C <sub>25</sub> H <sub>28</sub> CoN <sub>8</sub> O <sub>4</sub>   | C <sub>13</sub> H <sub>21</sub> CoN <sub>7</sub> O <sub>10</sub>  | C <sub>17</sub> H <sub>19</sub> N <sub>6</sub> O <sub>6</sub> Co  |
| Formula weight                                       | 506.42                                                            | 563.48                                                            | 494.30                                                            | 462.31                                                            |
| Temperature                                          | 100.00(10) K                                                      | 150.0 K                                                           | 296.0 K                                                           | 296.0 K                                                           |
| Crystal system                                       | monoclinic                                                        | monoclinic                                                        | monoclinic                                                        | monoclinic                                                        |
| Space group                                          | <i>P2<sub>1</sub>/n</i>                                           | <i>C2/c</i>                                                       | <i>P2<sub>1</sub>/c</i>                                           | <i>P2<sub>1</sub>/c</i>                                           |
| <i>a</i> (Å)                                         | 9.9206(8)                                                         | 25.621(3)                                                         | 7.6670(19)                                                        | 16.0546(12)                                                       |
| <i>b</i> (Å)                                         | 24.0797(17)                                                       | 8.0234(12)                                                        | 15.405(3)                                                         | 8.0594(5)                                                         |
| <i>c</i> (Å)                                         | 10.0515(8)                                                        | 24.820(3)                                                         | 18.209(5)                                                         | 15.2612(10)                                                       |
| <i>α</i> (°)                                         | 90                                                                | 90                                                                | 90                                                                | 90                                                                |
| <i>β</i> (°)                                         | 109.445(9)                                                        | 90.826(5)                                                         | 96.489(9)                                                         | 95.807(2)                                                         |
| <i>γ</i> (°)                                         | 90                                                                | 90                                                                | 90                                                                | 90                                                                |
| <i>V</i> (Å <sup>3</sup> )                           | 2264.2(3)                                                         | 5101.7(12)                                                        | 2136.9(9)                                                         | 1964.5(2)                                                         |
| <i>Z</i>                                             | 4                                                                 | 8                                                                 | 4                                                                 | 4                                                                 |
| <i>D</i> (g/cm <sup>3</sup> )                        | 1.486                                                             | 1.467                                                             | 1.536                                                             | 1.610                                                             |
| <i>Mu</i> (mm <sup>-1</sup> )                        | 0.800                                                             | 0.722                                                             | 0.868                                                             | 0.922                                                             |
| <i>F</i> (0 0 0)                                     | 1052.0                                                            | 2344.0                                                            | 1020.0                                                            | 952.0                                                             |
| Completeness                                         | 86.3                                                              | 99.7                                                              | 97.5                                                              | 99.8                                                              |
| Unique reflections                                   | 5438                                                              | 5878                                                              | 4738                                                              | 4502                                                              |
| Observed reflections                                 | 14627                                                             | 66456                                                             | 10263                                                             | 30050                                                             |
| <i>R</i> <sub>int</sub>                              | 0.0536                                                            | 0.0986                                                            | 0.0603                                                            | 0.0490                                                            |
| Final <i>R</i> indices [ <i>I</i> > 2σ( <i>I</i> ) ] | <i>R</i> <sub>1</sub> = 0.0532<br><i>wR</i> <sub>2</sub> = 0.0919 | <i>R</i> <sub>1</sub> = 0.0503<br><i>wR</i> <sub>2</sub> = 0.1398 | <i>R</i> <sub>1</sub> = 0.0900<br><i>wR</i> <sub>2</sub> = 0.2580 | <i>R</i> <sub>1</sub> = 0.0417<br><i>wR</i> <sub>2</sub> = 0.1051 |
| <i>R</i> indices (all data)                          | <i>R</i> <sub>1</sub> = 0.0850<br><i>wR</i> <sub>2</sub> = 0.1035 | <i>R</i> <sub>1</sub> = 0.0754<br><i>wR</i> <sub>2</sub> = 0.1596 | <i>R</i> <sub>1</sub> = 0.1113<br><i>wR</i> <sub>2</sub> = 0.2766 | <i>R</i> <sub>1</sub> = 0.0553<br><i>wR</i> <sub>2</sub> = 0.1145 |
| Goodness-of-fit on <i>F</i> <sup>2</sup>             | 1.039                                                             | 1.049                                                             | 1.057                                                             | 1.042                                                             |

**Table S2** Selected Bond Lengths (Å) and Bond Angles (°) for **1-4**.

| <b>Complex 1</b> |           |                 |           |
|------------------|-----------|-----------------|-----------|
| Co(1)-O(1)       | 2.183(17) | O(3)-Co(1)-O(2) | 91.32(8)  |
| Co(1)-O(2)       | 2.148(18) | O(3)-Co(1)-O(4) | 178.44(7) |
| Co(1)-O(3)       | 2.133(18) | O(3)-Co(1)-N(2) | 92.66(8)  |
| Co(1)-O(4)       | 2.146(17) | O(3)-Co(1)-N(3) | 91.69(8)  |
| Co(1)-N(2)       | 2.200(2)  | O(3)-Co(1)-N(4) | 86.50(7)  |
| Co(1)-N(3)       | 2.175(2)  | O(4)-Co(1)-O(1) | 88.73(7)  |
| Co(1)-N(4)       | 2.218(2)  | O(4)-Co(1)-O(2) | 88.99(7)  |
| O(1)-Co(1)-N(2)  | 69.77(7)  | O(4)-Co(1)-N(2) | 86.28(7)  |
| O(1)-Co(1)-N(4)  | 148.06(7) | O(4)-Co(1)-N(3) | 89.05(7)  |
| O(2)-Co(1)-O(1)  | 78.56(7)  | O(4)-Co(1)-N(4) | 95.04(7)  |
| O(2)-Co(1)-N(2)  | 148.05(7) | N(2)-Co(1)-N(4) | 142.06(8) |
| O(2)-Co(1)-N(3)  | 140.50(7) | N(3)-Co(1)-O(1) | 140.81(8) |
| O(2)-Co(1)-N(4)  | 69.83(7)  | N(3)-Co(1)-N(2) | 71.04(8)  |
| O(3)-Co(1)-O(1)  | 89.83(7)  | N(3)-Co(1)-N(4) | 71.07(8)  |

  

| <b>Complex 2</b> |           |                 |           |
|------------------|-----------|-----------------|-----------|
| Co(1)-O(1)       | 2.113(2)  | O(2)-Co(1)-N(4) | 69.73(8)  |
| Co(1)-O(2)       | 2.168(2)  | O(2)-Co(1)-N(6) | 92.56(9)  |
| Co(1)-O(3)       | 2.179(2)  | O(3)-Co(1)-N(4) | 91.39(8)  |
| Co(1)-N(1)       | 2.161(2)  | N(1)-Co(1)-O(2) | 138.65(9) |
| Co(1)-N(2)       | 2.146(2)  | N(1)-Co(1)-O(3) | 85.93(9)  |
| Co(1)-N(4)       | 2.233(2)  | N(1)-Co(1)-N(4) | 70.10(9)  |
| Co(1)-N(6)       | 2.172(3)  | N(1)-Co(1)-N(6) | 94.11(9)  |
| O(1)-Co(1)-O(2)  | 76.31(8)  | N(2)-Co(1)-O(2) | 147.11(9) |
| O(1)-Co(1)-O(3)  | 93.50(8)  | N(2)-Co(1)-O(3) | 86.11(9)  |
| O(1)-Co(1)-N(1)  | 144.63(9) | N(2)-Co(1)-N(1) | 72.17(9)  |
| O(1)-Co(1)-N(2)  | 72.50(9)  | N(2)-Co(1)-N(4) | 142.28(9) |
| O(1)-Co(1)-N(4)  | 145.18(9) | N(2)-Co(1)-N(6) | 96.43(9)  |
| O(1)-Co(1)-N(6)  | 87.99(9)  | N(6)-Co(1)-O(3) | 177.36(9) |
| O(2)-Co(1)-O(3)  | 85.60(9)  | N(6)-Co(1)-N(4) | 86.14(9)  |

| <b>Complex 3</b> |            |                  |            |
|------------------|------------|------------------|------------|
| Co(1)-O(1)       | 2.218(4)   | O(9)-Co(1)-N(2)  | 89.95(18)  |
| Co(1)-O(2)       | 2.147(4)   | O(9)-Co(1)-N(4)  | 91.66(18)  |
| Co(1)-O(9)       | 2.140(4)   | O(10)-Co(1)-O(1) | 89.9(2)    |
| Co(1)-O(10)      | 2.129(5)   | O(10)-Co(1)-O(2) | 88.8(2)    |
| Co(1)-N(1)       | 2.176(4)   | O(10)-Co(1)-O(9) | 177.3(2)   |
| Co(1)-N(2)       | 2.202(5)   | O(10)-Co(1)-N(1) | 91.36(19)  |
| Co(1)-N(4)       | 2.206(5)   | O(10)-Co(1)-N(2) | 88.7(2)    |
| O(2)-Co(1)-O(1)  | 76.00(18)  | O(10)-Co(1)-N(4) | 90.8(2)    |
| O(2)-Co(1)-N(1)  | 142.04(17) | N(1)-Co(1)-O(1)  | 141.95(16) |
| O(2)-Co(1)-N(2)  | 147.67(17) | N(1)-Co(1)-N(2)  | 70.25(16)  |
| O(2)-Co(1)-N(4)  | 72.14(17)  | N(1)-Co(1)-N(4)  | 69.91(16)  |
| O(9)-Co(1)-O(1)  | 87.50(18)  | N(2)-Co(1)-O(1)  | 71.76(16)  |
| O(9)-Co(1)-O(2)  | 91.11(19)  | N(2)-Co(1)-N(4)  | 140.13(17) |
| O(9)-Co(1)-N(1)  | 90.40(16)  | N(4)-Co(1)-O(1)  | 148.11(16) |

| <b>Complex 4</b> |            |                 |           |
|------------------|------------|-----------------|-----------|
| Co(1)-N(2)       | 2.172(2)   | O(1)-Co(1)-N(4) | 70.41(7)  |
| Co(1)-N(3)       | 2.175(2)   | O(2)-Co(1)-N(4) | 147.59(8) |
| Co(1)-N(4)       | 2.207(2)   | O(2)-Co(1)-O(1) | 77.2(7)   |
| Co(1)-O(1)       | 2.2033(18) | O(3)-Co(1)-N(2) | 100.25(8) |
| Co(1)-O(2)       | 2.1817(19) | O(3)-Co(1)-N(3) | 89.55(8)  |
| Co(1)-O(3)       | 2.1612(18) | O(3)-Co(1)-N(4) | 83.00(8)  |
| Co(1)-O(9)       | 2.101(2)   | O(3)-Co(1)-O(1) | 84.85(7)  |
| N(2)-Co(1)-N(3)  | 70.61(8)   | O(3)-Co(1)-O(2) | 92.79(8)  |
| N(2)-Co(1)-N(4)  | 140.66(8)  | O(9)-Co(1)-N(2) | 88.97(9)  |
| N(2)-Co(1)-O(1)  | 148.72(8)  | O(9)-Co(1)-N(3) | 93.03(10) |
| N(2)-Co(1)-O(2)  | 71.74(8)   | O(9)-Co(1)-N(4) | 89.51(10) |
| N(3)-Co(1)-N(4)  | 70.23(8)   | O(9)-Co(1)-O(1) | 87.53(9)  |
| N(3)-Co(1)-O(1)  | 140.62(8)  | O(9)-Co(1)-O(2) | 90.62(10) |
| N(3)-Co(1)-O(2)  | 142.08(8)  | O(9)-Co(1)-O(3) | 170.76(8) |

**Table S3** Hydrogen-bonded parameters /Å, ° for complexes **1-3**.

| Complex  | D-H | A                      | D-H   | H     | A | D-A   | DHA   |
|----------|-----|------------------------|-------|-------|---|-------|-------|
| <b>1</b> | H3  | O3-<br>N5 <sup>1</sup> | 0.846 | 1.941 |   | 2.784 | 173.6 |
|          | H4A | O4-<br>O2 <sup>2</sup> | 0.860 | 2.020 |   | 2.747 | 142.4 |
|          | H4B | O4-<br>O1 <sup>2</sup> | 0.860 | 1.890 |   | 2.694 | 154.6 |
| <b>2</b> | H3  | O3-<br>N8 <sup>1</sup> | 0.881 | 1.928 |   | 2.785 | 164.0 |
|          | H5  | N5-<br>N6 <sup>2</sup> | 0.880 | 2.110 |   | 2.928 | 154.7 |
|          | H4A | O4-<br>O1              | 0.840 | 2.150 |   | 2.965 | 164.5 |
| <b>3</b> | H9  | O9-<br>O4              | 0.856 | 1.918 |   | 2.759 | 167.0 |
|          | H10 | O10-<br>O6             | 0.820 | 1.940 |   | 2.754 | 175.7 |
|          | H3  | N3-<br>O3 <sup>1</sup> | 0.860 | 1.960 |   | 2.817 | 170.7 |
|          | H5  | N5-<br>O7 <sup>2</sup> | 0.860 | 1.980 |   | 2.829 | 168.2 |

**Table S4** Co(II) ions geometry analysis of **1-4** by SHAPE 2.1 software.

| Configuration | ABOXIY, 1    | ABOXIY, 2    | ABOXIY, 3    | ABOXIY, 4    |
|---------------|--------------|--------------|--------------|--------------|
| PBPY-7        | <b>0.197</b> | <b>0.285</b> | <b>0.104</b> | <b>0.335</b> |
| COC-7         | 7.246        | 7.028        | 7.782        | 6.727        |
| CTPR-7        | 5.510        | 5.505        | 6.097        | 4.913        |
| JPBPY-7       | 3.465        | 4.008        | 3.287        | 3.447        |
| JETPY-7       | 22.459       | 22.424       | 23.901       | 22.644       |

**Table S5** Relaxation fitting parameters from least-squares fitting of  $\chi(f)$  data under 2000 Oe dc field of **1**.

| $T(K)$ | $\chi_T$ | $\chi_S$ | $\alpha$ |
|--------|----------|----------|----------|
| 2.4    | 0.204    | 0.191    | 0.168    |
| 2.8    | 0.184    | 0.168    | 0.208    |
| 3.2    | 0.167    | 0.151    | 0.100    |
| 3.4    | 0.161    | 0.141    | 0.200    |
| 3.8    | 0.148    | 0.131    | 0.095    |

|     |       |       |       |
|-----|-------|-------|-------|
| 4.2 | 0.138 | 0.117 | 0.147 |
| 4.4 | 0.114 | 0.133 | 1.889 |
| 5   | 0.120 | 0.081 | 0.235 |

**Table S6** Relaxation fitting parameters from least-squares fitting of  $\chi(f)$  data under 2000 Oe dc field of 2.

| $T(K)$ | $\chi_T$ | $\chi_s$ | $\alpha$ |
|--------|----------|----------|----------|
| 2      | 0.312    | 0.192    | 0.111    |
| 2.5    | 0.272    | 0.155    | 0.115    |
| 3      | 0.239    | 0.131    | 0.096    |
| 3.5    | 0.213    | 0.110    | 0.109    |
| 4      | 0.191    | 0.097    | 0.091    |
| 4.5    | 0.172    | 0.087    | 0.071    |
| 5      | 0.157    | 0.073    | 0.082    |
| 5.5    | 0.144    | 0.062    | 0.067    |
| 6      | 0.133    | 0.037    | 0.088    |
| 6.5    | 0.123    | 0.012    | 0.046    |

**Table S7** Relaxation fitting parameters from least-squares fitting of  $\chi(f)$  data under 2000 Oe dc field of 4.

| $T(K)$ | $\chi_T$ | $\chi_s$ | $\alpha$ |
|--------|----------|----------|----------|
| 2.5    | 0.246    | 6.84E-18 | 0.422    |
| 3      | 0.218    | 1.06E-17 | 0.420    |
| 3.5    | 0.197    | 1.42E-17 | 0.416    |
| 4      | 0.178    | 1.95E-17 | 0.406    |
| 4.5    | 0.160    | 2.84E-17 | 0.370    |
| 5      | 0.146    | 4.44E-17 | 0.325    |
| 5.5    | 0.132    | 4.68E-17 | 0.254    |
| 6      | 0.121    | 8.36E-17 | 0.184    |
| 6.5    | 0.111    | 6.79E-16 | 0.095    |

**Table S8** The CASSCF/NEVPT2/def2-TZVP(-f) computed Individual contributions to  $D$ -tensor for complexes.

| 1    |      | 2      |         | 3    |      | 4      |        |      |      |        |        |      |      |        |         |
|------|------|--------|---------|------|------|--------|--------|------|------|--------|--------|------|------|--------|---------|
| 2S+1 | Root | $D$    | $E$     | 2S+1 | Root | $D$    | $E$    | 2S+1 | Root | $D$    | $E$    | 2S+1 | Root | $D$    | $E$     |
| 4    | 0    | 0.000  | 0.000   | 4    | 0    | 0.000  | 0.000  | 4    | 0    | 0.000  | 0.000  | 4    | 0    | 0.000  | 0.000   |
| 4    | 1    | 9.283  | 8.961   | 4    | 1    | 8.704  | 9.008  | 4    | 1    | 10.434 | 10.001 | 4    | 1    | 9.051  | 7.914   |
| 4    | 2    | 3.250  | -2.630  | 4    | 2    | 2.798  | -3.244 | 4    | 2    | 2.513  | -1.887 | 4    | 2    | 1.808  | -1.740  |
| 4    | 3    | 7.312  | 5.772   | 4    | 3    | 10.809 | -3.275 | 4    | 3    | 10.363 | 2.871  | 4    | 3    | 16.008 | -13.810 |
| 4    | 4    | 10.896 | -10.257 | 4    | 4    | 9.202  | 0.582  | 4    | 4    | 12.198 | -8.491 | 4    | 4    | 9.031  | 7.798   |
| 4    | 5    | 0.005  | -0.002  | 4    | 5    | 0.030  | -0.012 | 4    | 5    | 0.001  | -0.001 | 4    | 5    | 0.008  | -0.000  |



|   |    |        |        |   |    |        |        |   |    |        |        |   |    |        |        |
|---|----|--------|--------|---|----|--------|--------|---|----|--------|--------|---|----|--------|--------|
| 4 | 6  | 0.003  | -0.000 | 4 | 6  | 0.013  | 0.002  | 4 | 6  | 0.000  | 0.001  | 4 | 6  | 0.003  | 0.001  |
| 4 | 7  | 0.028  | 0.008  | 4 | 7  | 0.054  | -0.013 | 4 | 7  | 0.036  | -0.033 | 4 | 7  | 0.032  | -0.026 |
| 4 | 8  | 0.040  | -0.020 | 4 | 8  | 0.053  | -0.002 | 4 | 8  | 0.041  | 0.034  | 4 | 8  | 0.050  | 0.041  |
| 4 | 9  | 0.000  | -0.000 | 4 | 9  | 0.000  | -0.000 | 4 | 9  | 0.000  | 0.000  | 4 | 9  | 0.000  | -0.000 |
| 2 | 0  | 0.088  | -0.001 | 2 | 0  | 0.106  | -0.000 | 2 | 0  | 1.082  | 0.001  | 2 | 0  | 0.856  | 0.004  |
| 2 | 1  | -0.000 | 0.007  | 2 | 1  | 3.431  | -0.019 | 2 | 1  | 0.175  | 0.000  | 2 | 1  | 1.769  | -0.007 |
| 2 | 2  | -0.002 | -0.005 | 2 | 2  | 0.021  | 0.006  | 2 | 2  | 0.048  | -0.002 | 2 | 2  | -0.003 | -0.001 |
| 2 | 3  | 0.010  | -0.000 | 2 | 3  | -0.008 | 0.003  | 2 | 3  | 0.123  | 0.001  | 2 | 3  | -0.006 | 0.000  |
| 2 | 4  | 14.001 | -0.003 | 2 | 4  | -0.035 | -0.062 | 2 | 4  | 12.374 | 0.000  | 2 | 4  | 0.015  | -0.006 |
| 2 | 5  | -0.017 | -0.011 | 2 | 5  | -0.038 | 0.019  | 2 | 5  | -0.005 | -0.001 | 2 | 5  | 0.241  | 0.074  |
| 2 | 6  | 0.006  | 0.013  | 2 | 6  | 1.229  | -1.120 | 2 | 6  | 0.073  | 0.016  | 2 | 6  | 9.925  | -0.091 |
| 2 | 7  | -1.536 | -0.214 | 2 | 7  | 5.903  | -0.287 | 2 | 7  | -1.637 | -1.541 | 2 | 7  | -0.798 | -1.212 |
| 2 | 8  | -1.525 | 0.106  | 2 | 8  | -0.455 | 1.366  | 2 | 8  | -1.540 | 1.435  | 2 | 8  | -1.589 | 1.343  |
| 2 | 9  | -0.000 | 0.000  | 2 | 9  | -0.003 | 0.002  | 2 | 9  | -0.000 | -0.000 | 2 | 9  | -0.001 | -0.001 |
| 2 | 10 | -0.043 | 0.021  | 2 | 10 | -0.028 | 0.026  | 2 | 10 | -0.045 | 0.038  | 2 | 10 | -0.118 | -0.092 |
| 2 | 11 | -0.005 | -0.002 | 2 | 11 | -0.019 | -0.007 | 2 | 11 | -0.066 | -0.037 | 2 | 11 | -0.008 | 0.001  |
| 2 | 12 | -0.040 | 0.041  | 2 | 12 | -0.059 | 0.053  | 2 | 12 | -0.046 | -0.043 | 2 | 12 | -0.042 | 0.040  |
| 2 | 13 | -0.069 | -0.069 | 2 | 13 | -0.118 | -0.083 | 2 | 13 | -0.047 | -0.013 | 2 | 13 | -0.069 | -0.060 |
| 2 | 14 | -0.005 | 0.004  | 2 | 14 | -0.146 | 0.111  | 2 | 14 | -0.032 | 0.032  | 2 | 14 | -0.083 | 0.069  |
| 2 | 15 | -0.003 | -0.003 | 2 | 15 | -0.112 | -0.082 | 2 | 15 | 0.000  | -0.000 | 2 | 15 | -0.024 | -0.021 |
| 2 | 16 | -0.499 | 0.498  | 2 | 16 | 0.009  | -0.000 | 2 | 16 | -0.466 | 0.463  | 2 | 16 | -0.010 | -0.006 |
| 2 | 17 | -0.445 | -0.439 | 2 | 17 | -0.210 | 0.112  | 2 | 17 | -0.164 | -0.141 | 2 | 17 | -0.275 | -0.300 |
| 2 | 18 | 0.015  | -0.002 | 2 | 18 | -0.148 | -0.078 | 2 | 18 | -0.210 | -0.212 | 2 | 18 | -0.182 | 0.256  |
| 2 | 19 | -0.007 | -0.005 | 2 | 19 | -0.012 | -0.015 | 2 | 19 | -0.006 | -0.006 | 2 | 19 | 0.061  | 0.045  |
| 2 | 20 | 0.005  | 0.000  | 2 | 20 | 0.260  | 0.041  | 2 | 20 | 0.051  | -0.000 | 2 | 20 | -0.007 | 0.011  |
| 2 | 21 | 0.001  | -0.000 | 2 | 21 | -0.057 | -0.047 | 2 | 21 | 0.040  | -0.001 | 2 | 21 | 0.002  | 0.002  |
| 2 | 22 | 1.210  | 0.001  | 2 | 22 | 1.103  | -0.005 | 2 | 22 | 1.459  | -0.000 | 2 | 22 | 1.276  | -0.000 |
| 2 | 23 | -0.003 | -0.002 | 2 | 23 | -0.028 | 0.021  | 2 | 23 | -0.002 | 0.003  | 2 | 23 | -0.005 | 0.005  |
| 2 | 24 | -0.130 | -0.051 | 2 | 24 | -0.153 | -0.079 | 2 | 24 | -0.015 | -0.012 | 2 | 24 | -0.257 | 0.186  |
| 2 | 25 | -0.059 | 0.025  | 2 | 25 | -0.125 | 0.054  | 2 | 25 | -0.017 | 0.017  | 2 | 25 | -0.249 | 0.261  |
| 2 | 26 | -0.351 | -0.252 | 2 | 26 | -0.362 | -0.264 | 2 | 26 | -0.548 | 0.386  | 2 | 26 | -0.040 | -0.032 |
| 2 | 27 | -0.462 | 0.331  | 2 | 27 | -0.433 | 0.335  | 2 | 27 | -0.504 | -0.335 | 2 | 27 | -0.510 | -0.435 |
| 2 | 28 | 0.001  | 0.000  | 2 | 28 | 0.013  | 0.001  | 2 | 28 | -0.000 | -0.001 | 2 | 28 | 0.000  | 0.001  |
| 2 | 29 | 0.006  | -0.000 | 2 | 29 | 0.003  | -0.000 | 2 | 29 | -0.001 | 0.001  | 2 | 29 | 0.003  | -0.002 |
| 2 | 30 | -0.004 | 0.004  | 2 | 30 | -0.059 | 0.017  | 2 | 30 | -0.001 | 0.002  | 2 | 30 | -0.006 | 0.000  |
| 2 | 31 | -0.009 | -0.003 | 2 | 31 | -0.150 | -0.141 | 2 | 31 | -0.002 | -0.001 | 2 | 31 | -0.132 | 0.088  |

|   |    |        |        |   |    |        |        |   |    |        |        |   |    |        |        |
|---|----|--------|--------|---|----|--------|--------|---|----|--------|--------|---|----|--------|--------|
| 2 | 32 | -0.124 | -0.110 | 2 | 32 | -0.115 | 0.115  | 2 | 32 | -0.146 | -0.125 | 2 | 32 | -0.031 | 0.024  |
| 2 | 33 | -0.120 | 0.107  | 2 | 33 | -0.001 | 0.001  | 2 | 33 | -0.140 | 0.112  | 2 | 33 | -0.139 | -0.118 |
| 2 | 34 | -0.000 | 0.000  | 2 | 34 | -0.004 | 0.001  | 2 | 34 | -0.000 | 0.000  | 2 | 34 | -0.000 | -0.000 |
| 2 | 35 | 0.000  | -0.000 | 2 | 35 | -0.000 | -0.001 | 2 | 35 | 0.001  | -0.000 | 2 | 35 | 0.007  | 0.000  |
| 2 | 36 | 0.001  | 0.000  | 2 | 36 | -0.001 | -0.001 | 2 | 36 | 0.001  | -0.000 | 2 | 36 | 0.004  | -0.000 |
| 2 | 37 | -0.001 | -0.000 | 2 | 37 | 0.003  | -0.001 | 2 | 37 | -0.002 | -0.002 | 2 | 37 | -0.002 | -0.002 |
| 2 | 38 | -0.001 | 0.000  | 2 | 38 | 0.006  | 0.002  | 2 | 38 | -0.003 | 0.003  | 2 | 38 | -0.002 | 0.003  |
| 2 | 39 | 0.211  | 0.000  | 2 | 39 | 0.199  | 0.000  | 2 | 39 | 0.221  | 0.000  | 2 | 39 | 0.209  | 0.000  |

**Table S9** Energy levels ( $\text{cm}^{-1}$ ) of ligand field multiplets in zero field derived from CASSCF/def2-TZVP(-f) computed for complexes.

| 1      |                                    | 2      |                                    | 3      |                                    | 4      |                                    |
|--------|------------------------------------|--------|------------------------------------|--------|------------------------------------|--------|------------------------------------|
| States | Energy levels ( $\text{cm}^{-1}$ ) |
| 1      | 0.0                                | 1      | 0.0                                | 1      | 0.0                                | 1      | 0.0                                |
| 2      | 74.9                               | 2      | 75.2                               | 2      | 82.7                               | 2      | 82.3                               |
| 3      | 74.9                               | 3      | 75.2                               | 3      | 82.7                               | 3      | 82.3                               |
| 4      | 4510.3                             | 4      | 3312.1                             | 4      | 3825.2                             | 4      | 3269.2                             |
| 5      | 4510.3                             | 5      | 3312.1                             | 5      | 3825.2                             | 5      | 3269.2                             |
| 6      | 4921.5                             | 6      | 3583.8                             | 6      | 4205.9                             | 6      | 3556.9                             |
| 7      | 4921.5                             | 7      | 3583.8                             | 7      | 4205.9                             | 7      | 3556.9                             |
| 8      | 5378.7                             | 8      | 4396.8                             | 8      | 4576.3                             | 8      | 4527.3                             |
| 9      | 5378.7                             | 9      | 4396.8                             | 9      | 4576.3                             | 9      | 4527.3                             |
| 10     | 5481.7                             | 10     | 4488.4                             | 10     | 4654.1                             | 10     | 4594.5                             |
| 11     | 5481.7                             | 11     | 4488.4                             | 11     | 4654.1                             | 11     | 4594.5                             |
| 12     | 5889.2                             | 12     | 6009.7                             | 12     | 5440.4                             | 12     | 4995.3                             |
| 13     | 5889.2                             | 13     | 6009.7                             | 13     | 5440.4                             | 13     | 4995.3                             |
| 14     | 5965.9                             | 14     | 6107.1                             | 14     | 5539.2                             | 14     | 5132.8                             |
| 15     | 5965.9                             | 15     | 6107.1                             | 15     | 5539.2                             | 15     | 5132.8                             |
| 16     | 6298.9                             | 16     | 6357.0                             | 16     | 5616.9                             | 16     | 6286.2                             |
| 17     | 6298.9                             | 17     | 6357.0                             | 17     | 5616.9                             | 17     | 6286.2                             |
| 18     | 6624.4                             | 18     | 6473.7                             | 18     | 5801.3                             | 18     | 6441.4                             |
| 19     | 6624.4                             | 19     | 6473.7                             | 19     | 5801.3                             | 19     | 6441.4                             |
| 20     | 12649.9                            | 20     | 11693.1                            | 20     | 11080.4                            | 20     | 10821.7                            |
| 21     | 12649.9                            | 21     | 11693.1                            | 21     | 11080.4                            | 21     | 10821.7                            |

|    |         |    |         |    |         |    |         |
|----|---------|----|---------|----|---------|----|---------|
| 22 | 13023.2 | 22 | 11842.7 | 22 | 11315.7 | 22 | 11000.5 |
| 23 | 13023.2 | 23 | 11842.7 | 23 | 11315.7 | 23 | 11000.5 |
| 24 | 13471.1 | 24 | 14120.3 | 24 | 12479.4 | 24 | 12795.1 |
| 25 | 13471.1 | 25 | 14120.3 | 25 | 12479.4 | 25 | 12795.1 |
| 26 | 13764.5 | 26 | 14193.4 | 26 | 12630.1 | 26 | 12889.4 |
| 27 | 13764.5 | 27 | 14193.4 | 27 | 12630.1 | 27 | 12889.4 |
| 28 | 17937.7 | 28 | 15789.9 | 28 | 16684.5 | 28 | 17185.9 |
| 29 | 17937.7 | 29 | 15789.9 | 29 | 16684.5 | 29 | 17185.9 |
| 30 | 18271.6 | 30 | 17135.2 | 30 | 16719.5 | 30 | 17457.7 |
| 31 | 18271.6 | 31 | 17135.2 | 31 | 16719.5 | 31 | 17457.7 |
| 32 | 18346.1 | 32 | 17840.9 | 32 | 17706.5 | 32 | 18392.2 |
| 33 | 18346.1 | 33 | 17840.9 | 33 | 17706.5 | 33 | 18392.2 |
| 34 | 18745.1 | 34 | 18423.3 | 34 | 18002.5 | 34 | 18723.7 |
| 35 | 18745.1 | 35 | 18423.3 | 35 | 18002.5 | 35 | 18723.7 |
| 36 | 20668.1 | 36 | 20849.0 | 36 | 18155.0 | 36 | 19881.5 |
| 37 | 20668.1 | 37 | 20849.0 | 37 | 18155.0 | 37 | 19881.5 |
| 38 | 20790.3 | 38 | 20939.3 | 38 | 18827.4 | 38 | 19954.1 |
| 39 | 20790.3 | 39 | 20939.3 | 39 | 18827.4 | 39 | 19954.1 |
| 40 | 20885.9 | 40 | 21187.2 | 40 | 20056.0 | 40 | 20984.6 |
| 41 | 20885.9 | 41 | 21187.2 | 41 | 20056.0 | 41 | 20984.6 |
| 42 | 21272.5 | 42 | 21412.7 | 42 | 20161.3 | 42 | 21171.5 |
| 43 | 21272.5 | 43 | 21412.7 | 43 | 20161.3 | 43 | 21171.5 |
| 44 | 21438.5 | 44 | 21498.8 | 44 | 20949.8 | 44 | 21313.3 |
| 45 | 21438.5 | 45 | 21498.8 | 45 | 20949.8 | 45 | 21313.3 |
| 46 | 22482.8 | 46 | 21769.3 | 46 | 21814.0 | 46 | 21597.5 |
| 47 | 22482.8 | 47 | 21769.3 | 47 | 21814.0 | 47 | 21597.5 |
| 48 | 22905.8 | 48 | 21909.2 | 48 | 22129.5 | 48 | 21769.8 |
| 49 | 22905.8 | 49 | 21909.2 | 49 | 22129.5 | 49 | 21769.8 |
| 50 | 22967.9 | 50 | 22113.7 | 50 | 22262.3 | 50 | 22059.1 |
| 51 | 22967.9 | 51 | 22113.7 | 51 | 22262.3 | 51 | 22059.1 |
| 52 | 23362.1 | 52 | 22444.4 | 52 | 22717.0 | 52 | 22580.0 |
| 53 | 23362.1 | 53 | 22444.4 | 53 | 22717.0 | 53 | 22580.0 |
| 54 | 23464.0 | 54 | 23179.8 | 54 | 23000.6 | 54 | 23137.6 |
| 55 | 23464.0 | 55 | 23179.8 | 55 | 23000.6 | 55 | 23137.6 |
| 56 | 25562.1 | 56 | 23780.4 | 56 | 24316.7 | 56 | 23891.0 |
| 57 | 25562.1 | 57 | 23780.4 | 57 | 24316.7 | 57 | 23891.0 |

|    |         |    |         |    |         |    |         |
|----|---------|----|---------|----|---------|----|---------|
| 58 | 25814.8 | 58 | 24028.3 | 58 | 24496.3 | 58 | 24136.9 |
| 59 | 25814.8 | 59 | 24028.3 | 59 | 24496.3 | 59 | 24136.9 |
| 60 | 26987.5 | 60 | 25317.0 | 60 | 26111.2 | 60 | 25343.2 |
| 61 | 26987.5 | 61 | 25317.0 | 61 | 26111.2 | 61 | 25343.2 |
| 62 | 27099.1 | 62 | 25685.7 | 62 | 26433.4 | 62 | 26399.2 |
| 63 | 27099.1 | 63 | 25685.7 | 63 | 26433.4 | 63 | 26399.2 |
| 64 | 27336.6 | 64 | 27431.7 | 64 | 26778.3 | 64 | 26548.5 |
| 65 | 27336.6 | 65 | 27431.7 | 65 | 26778.3 | 65 | 26548.5 |
| 66 | 27738.2 | 66 | 27631.4 | 66 | 27140.4 | 66 | 27520.9 |
| 67 | 27738.2 | 67 | 27631.4 | 67 | 27140.4 | 67 | 27520.9 |
| 68 | 28592.2 | 68 | 28104.7 | 68 | 27672.8 | 68 | 27777.7 |
| 69 | 28592.2 | 69 | 28104.7 | 69 | 27672.8 | 69 | 27777.7 |
| 70 | 28652.8 | 70 | 28598.0 | 70 | 28050.7 | 70 | 28133.9 |
| 71 | 28652.8 | 71 | 28598.0 | 71 | 28050.7 | 71 | 28133.9 |
| 72 | 29107.9 | 72 | 29947.0 | 72 | 28379.3 | 72 | 28891.4 |
| 73 | 29107.9 | 73 | 29947.0 | 73 | 28379.3 | 73 | 28891.4 |
| 74 | 29465.6 | 74 | 30428.5 | 74 | 29336.8 | 74 | 29523.8 |
| 75 | 29465.6 | 75 | 30428.5 | 75 | 29336.8 | 75 | 29523.8 |
| 76 | 31243.0 | 76 | 30736.4 | 76 | 29573.4 | 76 | 29795.2 |
| 77 | 31243.0 | 77 | 30736.4 | 77 | 29573.4 | 77 | 29795.2 |
| 78 | 31578.9 | 78 | 31132.1 | 78 | 30671.4 | 78 | 30082.8 |
| 79 | 31578.9 | 79 | 31132.1 | 79 | 30671.4 | 79 | 30082.8 |
| 80 | 32177.3 | 80 | 31764.3 | 80 | 30926.6 | 80 | 30903.4 |
| 81 | 32177.3 | 81 | 31764.3 | 81 | 30926.6 | 81 | 30903.4 |
| 82 | 32335.8 | 82 | 31990.2 | 82 | 31276.1 | 82 | 31381.6 |
| 83 | 32335.8 | 83 | 31990.2 | 83 | 31276.1 | 83 | 31381.6 |
| 84 | 33040.8 | 84 | 32582.8 | 84 | 31679.7 | 84 | 31595.5 |
| 85 | 33040.8 | 85 | 32582.8 | 85 | 31679.7 | 85 | 31595.5 |
| 86 | 34103.7 | 86 | 33530.9 | 86 | 32702.2 | 86 | 32547.9 |
| 87 | 34103.7 | 87 | 33530.9 | 87 | 32702.2 | 87 | 32547.9 |
| 88 | 34334.3 | 88 | 33922.6 | 88 | 33080.8 | 88 | 32997.3 |
| 89 | 34334.3 | 89 | 33922.6 | 89 | 33080.8 | 89 | 32997.3 |
| 90 | 34633.9 | 90 | 34150.0 | 90 | 33177.9 | 90 | 33493.7 |
| 91 | 34633.9 | 91 | 34150.0 | 91 | 33177.9 | 91 | 33493.7 |
| 92 | 35137.1 | 92 | 34921.5 | 92 | 33865.4 | 92 | 33792.5 |
| 93 | 35137.1 | 93 | 34921.5 | 93 | 33865.4 | 93 | 33792.5 |

|     |         |     |         |     |         |     |         |
|-----|---------|-----|---------|-----|---------|-----|---------|
| 94  | 36019.7 | 94  | 35699.0 | 94  | 34578.0 | 94  | 34953.6 |
| 95  | 36019.7 | 95  | 35699.0 | 95  | 34578.0 | 95  | 34953.6 |
| 96  | 42854.2 | 96  | 42585.1 | 96  | 42136.0 | 96  | 42217.8 |
| 97  | 42854.2 | 97  | 42585.1 | 97  | 42136.0 | 97  | 42217.8 |
| 98  | 43153.8 | 98  | 42907.4 | 98  | 42434.8 | 98  | 42519.8 |
| 99  | 43153.8 | 99  | 42907.4 | 99  | 42434.8 | 99  | 42519.8 |
| 100 | 44407.6 | 100 | 43450.4 | 100 | 43377.7 | 100 | 43222.0 |
| 101 | 44407.6 | 101 | 43450.4 | 101 | 43377.7 | 101 | 43222.0 |
| 102 | 44785.0 | 102 | 43989.2 | 102 | 44011.4 | 102 | 43999.5 |
| 103 | 44785.0 | 103 | 43989.2 | 103 | 44011.4 | 103 | 43999.5 |
| 104 | 45511.5 | 104 | 44234.7 | 104 | 44379.2 | 104 | 44101.9 |
| 105 | 45511.5 | 105 | 44234.7 | 105 | 44379.2 | 105 | 44101.9 |
| 106 | 45658.2 | 106 | 44592.2 | 106 | 44486.2 | 106 | 44354.7 |
| 107 | 45658.2 | 107 | 44592.2 | 107 | 44486.2 | 107 | 44354.7 |
| 108 | 46189.2 | 108 | 44827.7 | 108 | 44968.8 | 108 | 44798.2 |
| 109 | 46189.2 | 109 | 44827.7 | 109 | 44968.8 | 109 | 44798.2 |
| 110 | 64302.9 | 110 | 63907.3 | 110 | 63115.4 | 110 | 63258.4 |
| 111 | 64302.9 | 111 | 63907.3 | 111 | 63115.4 | 111 | 63258.4 |
| 112 | 64432.0 | 112 | 64115.4 | 112 | 63396.8 | 112 | 63422.1 |
| 113 | 64432.0 | 113 | 64115.4 | 113 | 63396.8 | 113 | 63422.1 |
| 114 | 66176.0 | 114 | 64927.4 | 114 | 64922.3 | 114 | 64793.9 |
| 115 | 66176.0 | 115 | 64927.4 | 115 | 64922.3 | 115 | 64793.9 |
| 116 | 66524.9 | 116 | 65360.5 | 116 | 65291.3 | 116 | 65297.1 |
| 117 | 66524.9 | 117 | 65360.5 | 117 | 65291.3 | 117 | 65297.1 |
| 118 | 68286.7 | 118 | 66489.6 | 118 | 66776.0 | 118 | 66713.3 |
| 119 | 68286.7 | 119 | 66489.6 | 119 | 66776.0 | 119 | 66713.3 |

**Table S10** Structural and magnetic parameters for the reported pentagonal-bipyramidal Co(II) complexes.

| Molecular formula                                                                    | Donors                        | Deviation <sup>a</sup> | Co-X <sub>axial</sub> distance /Å | X <sub>axial</sub> -Co-X <sub>axial</sub> angle /° | Average Co-X <sub>eq</sub> distance/ Å | Angular distortion b/° | The slow relaxation process     |                         |                     |
|--------------------------------------------------------------------------------------|-------------------------------|------------------------|-----------------------------------|----------------------------------------------------|----------------------------------------|------------------------|---------------------------------|-------------------------|---------------------|
|                                                                                      |                               |                        |                                   |                                                    |                                        |                        | D exp. (cal.) /cm <sup>-1</sup> | τ <sub>0</sub> /s       | U <sub>eff</sub> /K |
| [Co(dapbh)(H <sub>2</sub> O)(CH <sub>3</sub> OH)]<br><b>(1)</b> <sup>this work</sup> | N <sub>3</sub> O <sub>4</sub> | 0.197                  | 2.133                             | 178.44                                             | 2.1848                                 | 12.85                  | 27.6(37.338)                    | 4.24 × 10 <sup>-4</sup> | 22.16 (2000 Oe)     |

|                                                                                                                                                          |                               |       |                  |        |         |       |              |                         |                 |
|----------------------------------------------------------------------------------------------------------------------------------------------------------|-------------------------------|-------|------------------|--------|---------|-------|--------------|-------------------------|-----------------|
|                                                                                                                                                          |                               |       | 2.146            |        |         |       |              |                         |                 |
| [Co(dapbh)(N <sub>3</sub> )(CH <sub>3</sub> OH)]·(CH <sub>3</sub> OH) <b>(2)</b> <sup>this work</sup>                                                    | N <sub>4</sub> O <sub>3</sub> | 0.285 | 2.179<br>2.172   | 177.36 | 2.1642  | 9.15  | 21.9(37.273) | 2.15 × 10 <sup>-8</sup> | 44.15 (2000 Oe) |
| [Co(H <sub>2</sub> aapbh)(CH <sub>3</sub> OH) <sub>2</sub> ](NO <sub>3</sub> ) <sub>2</sub> <b>(3)</b> <sup>this work</sup>                              | N <sub>3</sub> O <sub>4</sub> | 0.104 | 2.129<br>2.140   | 177.30 | 2.1898  | 9.22  | 31.9(41.138) | —                       | —               |
| [Co(H <sub>2</sub> bapbh)(H <sub>2</sub> O)(NO <sub>3</sub> <sup>-</sup> ) <sub>2</sub> ](NO <sub>3</sub> <sup>-</sup> ) <b>(4)</b> <sup>this work</sup> | N <sub>3</sub> O <sub>4</sub> | 0.335 | 2.101<br>2.161   | 170.76 | 2.1817  | 10.21 | 33.1(41.139) | 1.03 × 10 <sup>-8</sup> | 48.72 (2000 Oe) |
| [Co(tdmmb)(H <sub>2</sub> O) <sub>2</sub> ][BF <sub>4</sub> ] <sub>2</sub> <b>(5)</b> <sup>1</sup>                                                       | N <sub>5</sub> O <sub>2</sub> | 0.101 | 2.171<br>2.173   | 178.1  | 2.1624  | 9.878 | 25.6(34.5)   | 5.2 × 10 <sup>-9</sup>  | 85.2 (200 Oe)   |
| [Co(tdmmb)(CN) <sub>2</sub> ] <sub>2</sub> ·2H <sub>2</sub> O <b>(6)</b> <sup>1</sup>                                                                    | N <sub>5</sub> C <sub>2</sub> | 0.109 | 2.150<br>2.140   | 179.3  | 2.1744  | 7.458 | 17.4(35.1)   | 7.4 × 10 <sup>-10</sup> | 76.4 (200 Oe)   |
| [Co(tdmmb)(NCS) <sub>2</sub> ] <sub>2</sub> <b>(7)</b> <sup>1</sup>                                                                                      | N <sub>7</sub>                | 0.195 | 2.123<br>2.123   | 175.5  | 2.1726  | 8.394 | 26.3(37.7)   | 8.2 × 10 <sup>-8</sup>  | 82.2 (200 Oe)   |
| [Co(tdmmb)(SPh) <sub>2</sub> ] <sub>2</sub> <b>(8)</b> <sup>1</sup>                                                                                      | N <sub>5</sub> S <sub>2</sub> | 0.667 | 2.5199<br>2.5456 | 176.5  | 2.17404 | 8.456 | 34.5(39.7)   | 6.5 × 10 <sup>-8</sup>  | 98.6 (200 Oe)   |
| [Co(H <sub>4</sub> L)(DMF)(H <sub>2</sub> O)](NO <sub>3</sub> ) <sub>2</sub> ·(DMF) <b>(9)</b> <sup>2</sup>                                              | N <sub>3</sub> O <sub>4</sub> | 0.293 | 2.113<br>2.124   | 171.45 | 2.19656 | 11.69 | 35.92(36.29) | 6.5 × 10 <sup>-6</sup>  | 25 (2000 Oe)    |
| [Co(H <sub>4</sub> L)(MeOH)(H <sub>2</sub> O)](NO <sub>3</sub> ) <sub>2</sub> ·(MeOH) <b>(10)</b> <sup>2</sup>                                           | N <sub>3</sub> O <sub>4</sub> | 0.067 | 2.152<br>2.173   | 179.84 | 2.161   | 4.85  | 37.23(36.15) | 3.5 × 10 <sup>-6</sup>  | 15 (2000 Oe)    |
| [Co(H <sub>4</sub> L)(DEF)(H <sub>2</sub> O)](NO <sub>3</sub> ) <sub>2</sub> <b>(11)</b> <sup>2</sup>                                                    | N <sub>3</sub> O <sub>4</sub> | 0.253 | 2.090<br>2.133   | 174.4  | 2.1886  | 9.9   | 43.76(37.43) | 1.9 × 10 <sup>-6</sup>  | 4 (2000 Oe)     |
| [Co(H <sub>2</sub> dapbh)(SCN) <sub>2</sub> ] <sub>2</sub> ·3H <sub>2</sub> O <b>(12)</b> <sup>3</sup>                                                   | N <sub>5</sub> O <sub>2</sub> | 0.250 | 2.078<br>2.120   | 179.33 | 2.2214  | 10.68 | 15.9(14.6)   | —                       | —               |
| [Co(dapbh)(H <sub>2</sub> O) <sub>2</sub> ] <b>(13)</b> <sup>3</sup>                                                                                     | N <sub>3</sub> O <sub>4</sub> | 0.342 | 2.096<br>2.119   | 175.18 | 2.213   | 14.81 | 13.1(12.4)   | —                       | —               |
| [Co(H <sub>2</sub> dapbh)(NO <sub>3</sub> )(H <sub>2</sub> O)](NO <sub>3</sub> ) <b>(14)</b> <sup>4</sup>                                                | N <sub>3</sub> O <sub>4</sub> | 0.417 | 2.129<br>2.140   | 173.44 | 2.1944  | 12.96 | 32.4         | 6 × 10 <sup>-10</sup>   | 81.2 (1000 Oe)  |
| [CoL <sub>N5</sub> <sup>1</sup> (H <sub>2</sub> O) <sub>2</sub> ]Cl <sub>2</sub> ·4H <sub>2</sub> O <b>(15)</b> <sup>4</sup>                             | N <sub>5</sub> O <sub>2</sub> | 0.289 | 2.177            | 176.11 | 2.2373  | 7.24  | 24.6         | 1.2 × 10 <sup>-6</sup>  | 29.8 (1000 Oe)  |

|                                                                                                                                                                                                                                                                                                                                                                                                                                                                                                                                                                                                                                                                                                                                                                                                                                                                                                                                  |                                               |       |        |         |         |       |            |                         |                |
|----------------------------------------------------------------------------------------------------------------------------------------------------------------------------------------------------------------------------------------------------------------------------------------------------------------------------------------------------------------------------------------------------------------------------------------------------------------------------------------------------------------------------------------------------------------------------------------------------------------------------------------------------------------------------------------------------------------------------------------------------------------------------------------------------------------------------------------------------------------------------------------------------------------------------------|-----------------------------------------------|-------|--------|---------|---------|-------|------------|-------------------------|----------------|
|                                                                                                                                                                                                                                                                                                                                                                                                                                                                                                                                                                                                                                                                                                                                                                                                                                                                                                                                  |                                               |       | 2.189  |         |         |       |            |                         |                |
| [Co(dapbh)(im) <sub>2</sub> ]-H <sub>2</sub> O ( <b>16</b> ) <sup>4</sup>                                                                                                                                                                                                                                                                                                                                                                                                                                                                                                                                                                                                                                                                                                                                                                                                                                                        | N <sub>5</sub> O <sub>2</sub>                 | 0.364 | 2.131  | 174.97  | 2.23676 | 19.1  | 24.8       | 8.7 × 10 <sup>-11</sup> | 89.6 (1000 Oe) |
|                                                                                                                                                                                                                                                                                                                                                                                                                                                                                                                                                                                                                                                                                                                                                                                                                                                                                                                                  |                                               |       | 2.131  |         |         |       |            |                         |                |
| [Co(L <sup>5H</sup> )Cl <sub>2</sub> ]-2CH <sub>3</sub> OH( <b>17</b> ) <sup>5</sup>                                                                                                                                                                                                                                                                                                                                                                                                                                                                                                                                                                                                                                                                                                                                                                                                                                             | N <sub>3</sub> O <sub>2</sub> Cl <sub>2</sub> | 0.498 | 2.464  | 176.07  | 2.24542 | 7.46  | 38(44.8)   | 2.01 × 10 <sup>-6</sup> | 7.9(3000 Oe)   |
|                                                                                                                                                                                                                                                                                                                                                                                                                                                                                                                                                                                                                                                                                                                                                                                                                                                                                                                                  |                                               |       | 2.472  |         |         |       |            |                         |                |
| [Co(L <sup>5H</sup> )Br <sub>2</sub> ]( <b>18</b> ) <sup>5</sup>                                                                                                                                                                                                                                                                                                                                                                                                                                                                                                                                                                                                                                                                                                                                                                                                                                                                 | N <sub>3</sub> O <sub>2</sub> Br <sub>2</sub> | 0.868 | 2.6441 | 177.62  | 2.2354  | 8     | 41(44.0)   | 2.57 × 10 <sup>-7</sup> | 17.6(1000 Oe)  |
|                                                                                                                                                                                                                                                                                                                                                                                                                                                                                                                                                                                                                                                                                                                                                                                                                                                                                                                                  |                                               |       | 2.6434 |         |         |       |            |                         |                |
| [Co(L <sup>5H</sup> )I <sub>2</sub> ]( <b>19</b> ) <sup>5</sup>                                                                                                                                                                                                                                                                                                                                                                                                                                                                                                                                                                                                                                                                                                                                                                                                                                                                  | N <sub>3</sub> O <sub>2</sub> I <sub>2</sub>  | 1.689 | 2.208  | 176.74  | 2.2344  | 8.8   | 35(43.4)   | 1.06 × 10 <sup>-7</sup> | 30.6(2000 Oe)  |
|                                                                                                                                                                                                                                                                                                                                                                                                                                                                                                                                                                                                                                                                                                                                                                                                                                                                                                                                  |                                               |       | 2.8155 |         |         |       |            |                         |                |
| Co(L <sup>2,2'</sup> -bipy)(NO <sub>3</sub> ) <sub>2</sub> (CH <sub>3</sub> CN)]( <b>20</b> ) <sup>6</sup>                                                                                                                                                                                                                                                                                                                                                                                                                                                                                                                                                                                                                                                                                                                                                                                                                       | N <sub>3</sub> O <sub>4</sub>                 | 1.885 | 2.109  | 176.34  | 2.271   | 64.54 | 32.9(33.9) | 7.73 × 10 <sup>-9</sup> | 55.1(1000 Oe)  |
|                                                                                                                                                                                                                                                                                                                                                                                                                                                                                                                                                                                                                                                                                                                                                                                                                                                                                                                                  |                                               |       | 2.084  |         |         |       |            |                         |                |
| [Co(O <sub>3</sub> N)(H <sub>2</sub> O) <sub>3</sub> ]( <b>21</b> ) <sup>7</sup>                                                                                                                                                                                                                                                                                                                                                                                                                                                                                                                                                                                                                                                                                                                                                                                                                                                 | NO <sub>6</sub>                               | 0.490 | 2.0972 | 174.447 | 2.2447  | 31.34 | 70.41()    | 1.35 × 10 <sup>-5</sup> | 5.27(1500 Oe)  |
|                                                                                                                                                                                                                                                                                                                                                                                                                                                                                                                                                                                                                                                                                                                                                                                                                                                                                                                                  |                                               |       | 2.0898 |         |         |       |            |                         |                |
| <p>H<sub>2</sub>dapbh = 2,6-diacetylpyridine bis(benzoyl hydrazine); tdmmb = 1,3,10,12-tetramethyl-1,2,11,12-tetraaza[[3](2,6)-pyridino[3](2,9)-1,10-phenanthroline]-2,10-diene; SPh<sup>-</sup> = thiophenol anion; H<sub>4</sub>L = 2,2'-(pyridine-2,6-diylbis(ethan-1-yl-1-ylidene))bis(N-phenylhydrazinecarboxamide); L<sub>N5</sub><sup>1</sup> = 2,13-dimethyl-3,6,9,12-tetraaza-1(2,6)-pyridinacyclotridecaphane-2,12-diene; im = imidazole; L<sup>5H</sup> = 15-membered pyridine-based macrocyclic ligand (3,12,18-triaza-6,9-dioxabicyclo[12.3.1]octadeca-1(18),14,16-triene); L<sup>CH2Py</sup> = {3,12-bis(2-methylpyridine)-3,12,18-triaza-6,9-dioxabicyclo[12.3.1]octadeca-1,14,16-triene; L<sup>2-bzimi</sup> = 3,12-bis((1H-benzimidazol-2-yl)methyl)-6,9-dioxabicyclo[12.3.1]octadeca-1(18),14,16-triene; L<sup>2,2'-bipy</sup> = 2,2'-bipyridine; O<sub>3</sub>N = 8-carboxymethoxy-2-carboxylicquinoline.</p> |                                               |       |        |         |         |       |            |                         |                |

<sup>a</sup> The extent of deviation is confirmed by the continuous shape measures (CShMs) calculated with SHAPE 2.1.

<sup>b</sup> Angular distortion parameter = average distortion of the equatorial donor-metal-donor angles from the ideal 72°.

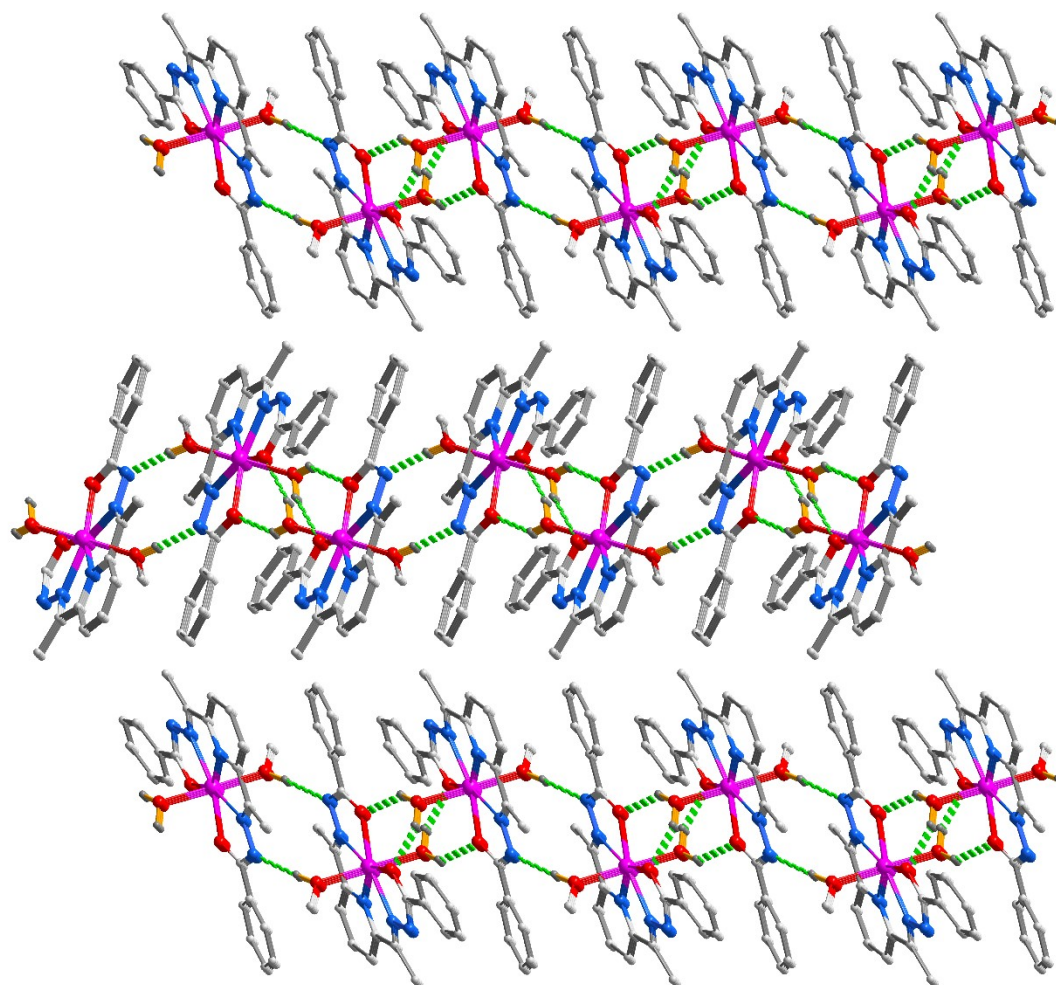

**Fig. S1** 1D chains formed via intermolecular hydrogen bonds and packing crystal structures of **1**.



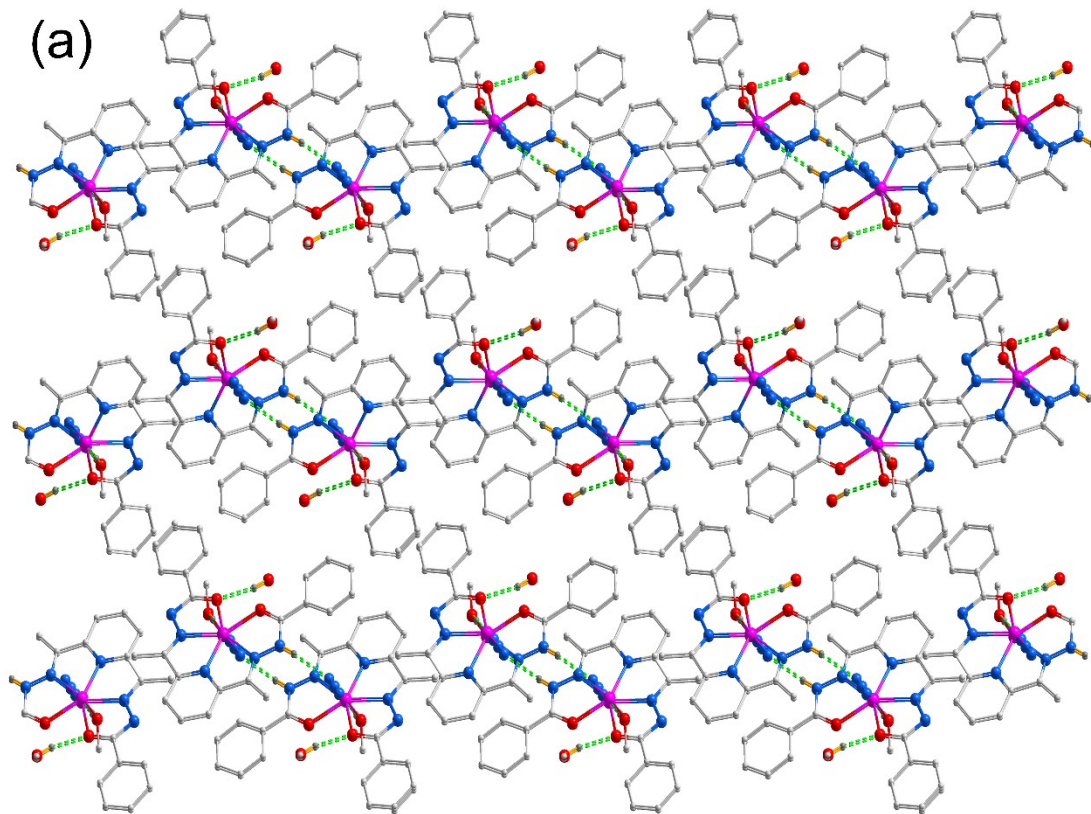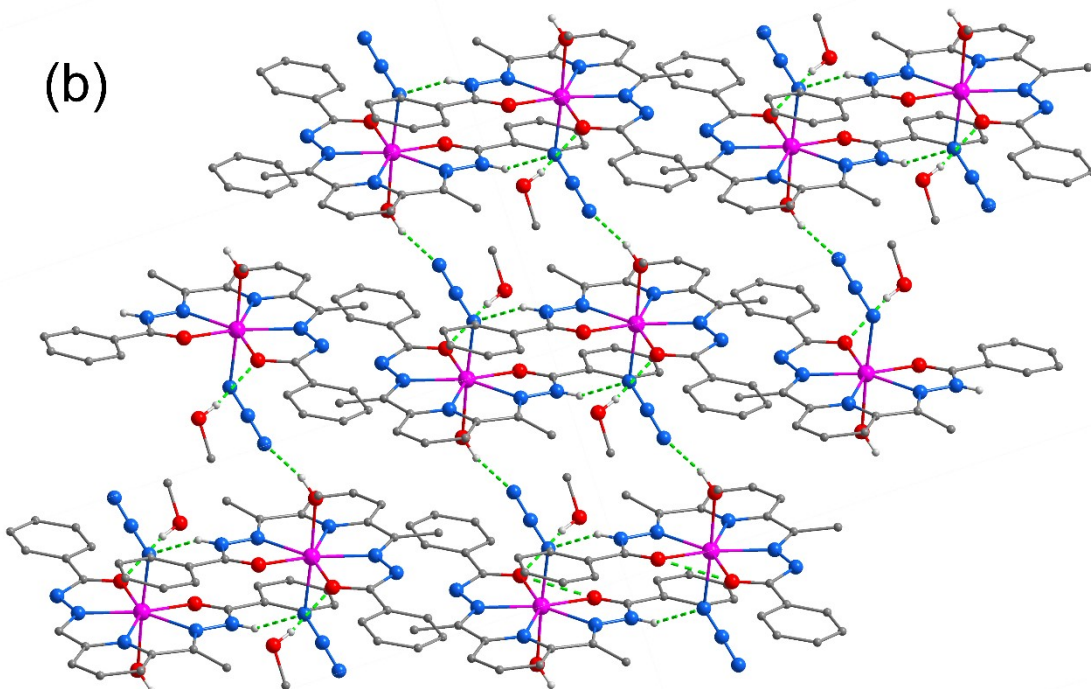

**Fig. S2** 1D chains formed via intermolecular hydrogen bonds along the b-axis(a) and packing crystal structures, 1D chains formed via intermolecular hydrogen bonds along the c-axis (b) of **2**.

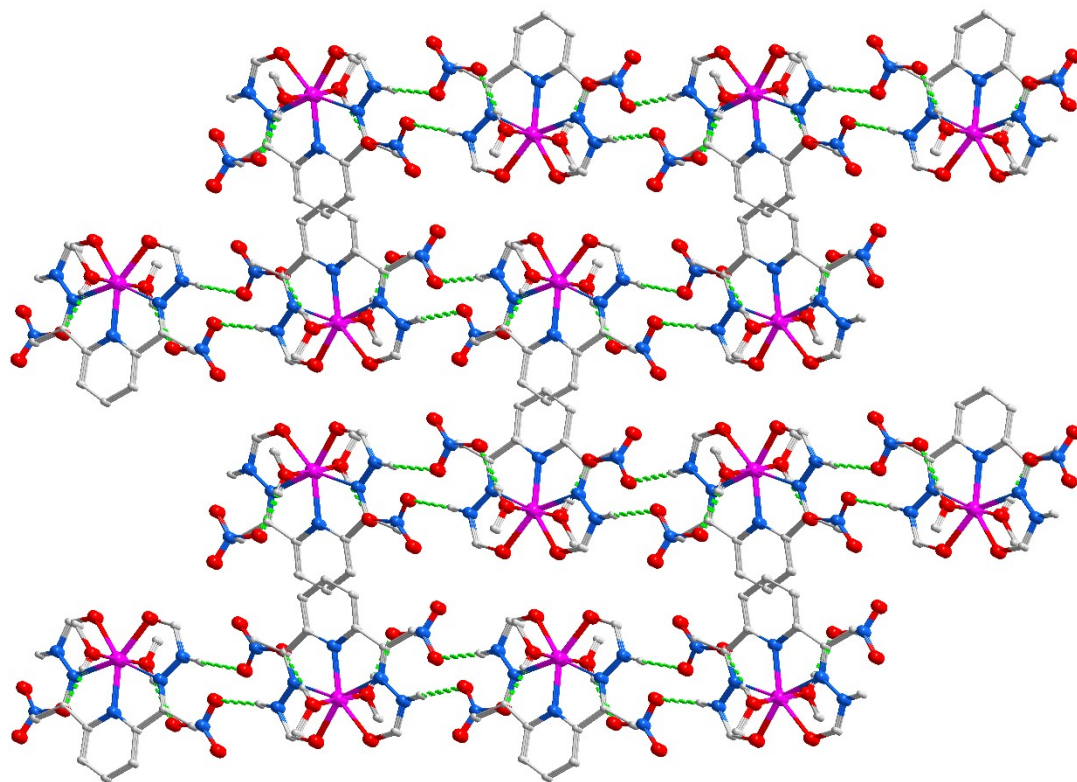

**Fig. S3** 1D chains formed via intermolecular hydrogen bonds and packing crystal structures of **3**.

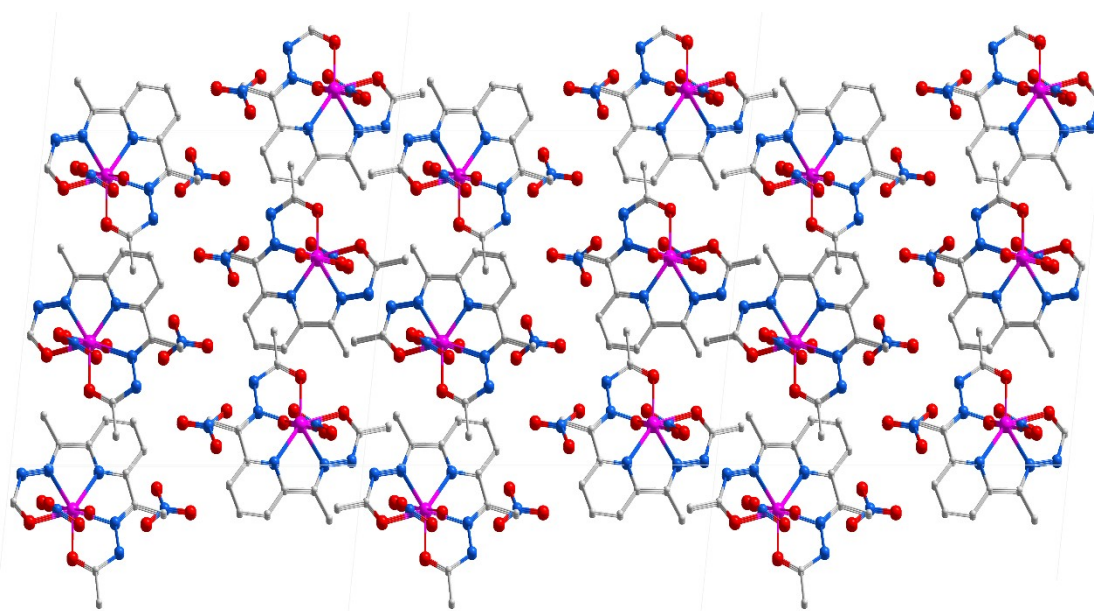

**Fig. S4** The packing crystal structures of **4**.

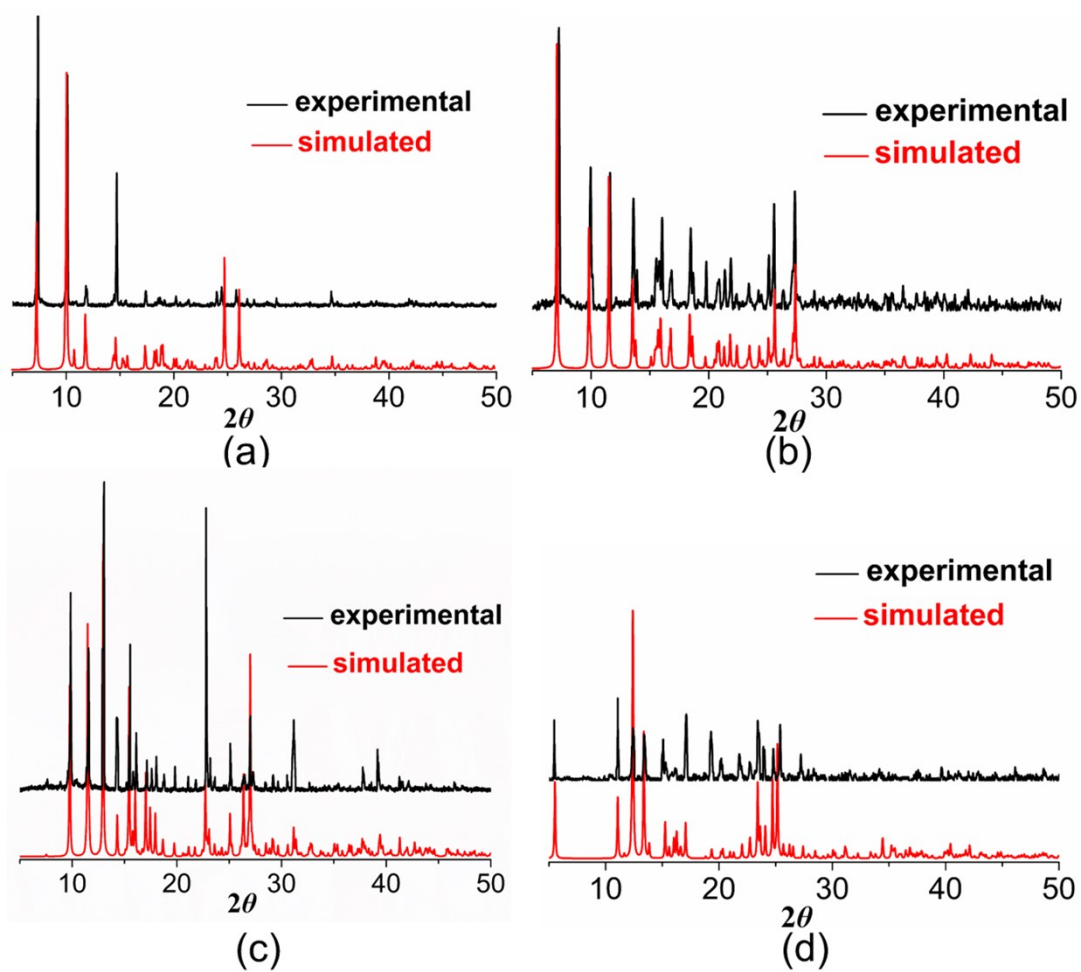

**Fig. S5** PXRD patterns for complexes **1(a)**, **2(b)**, **3(c)**, **4(d)**.

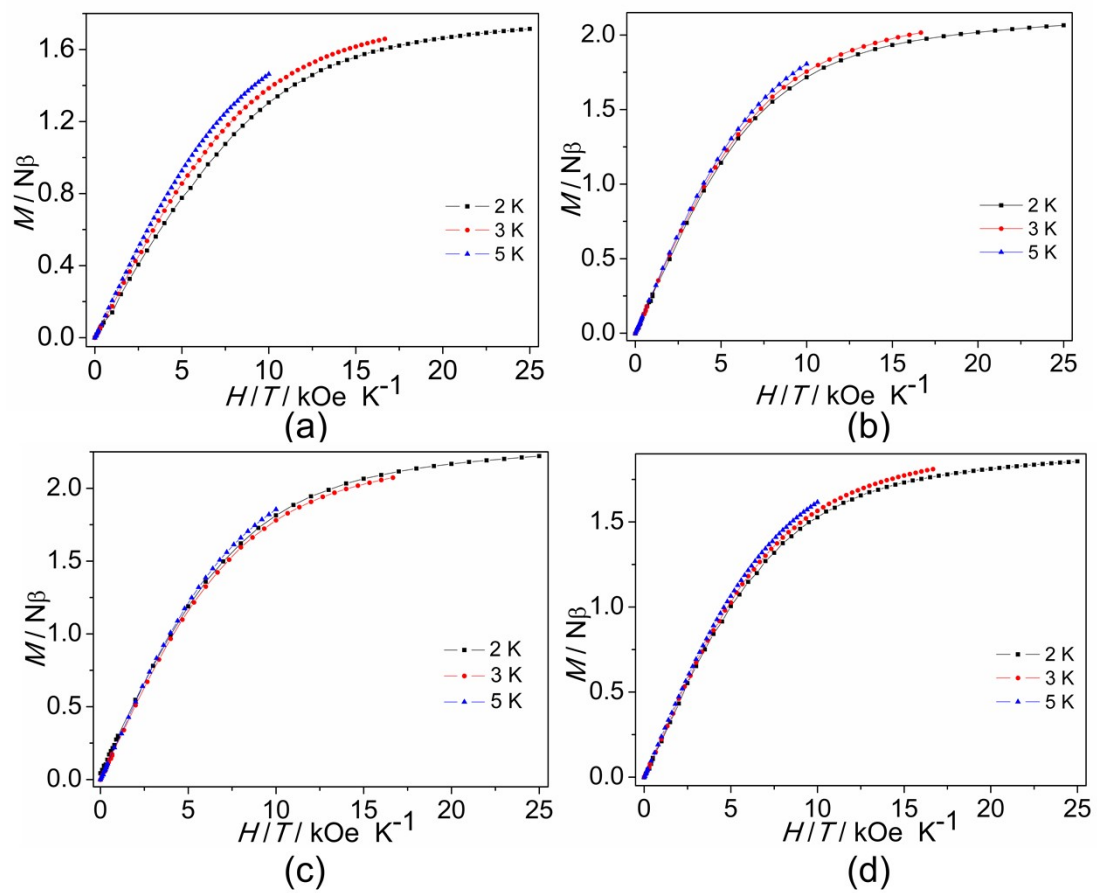

**Fig. S6** Plots of  $M$  vs  $H/T$  for **1-4** at different temperatures.

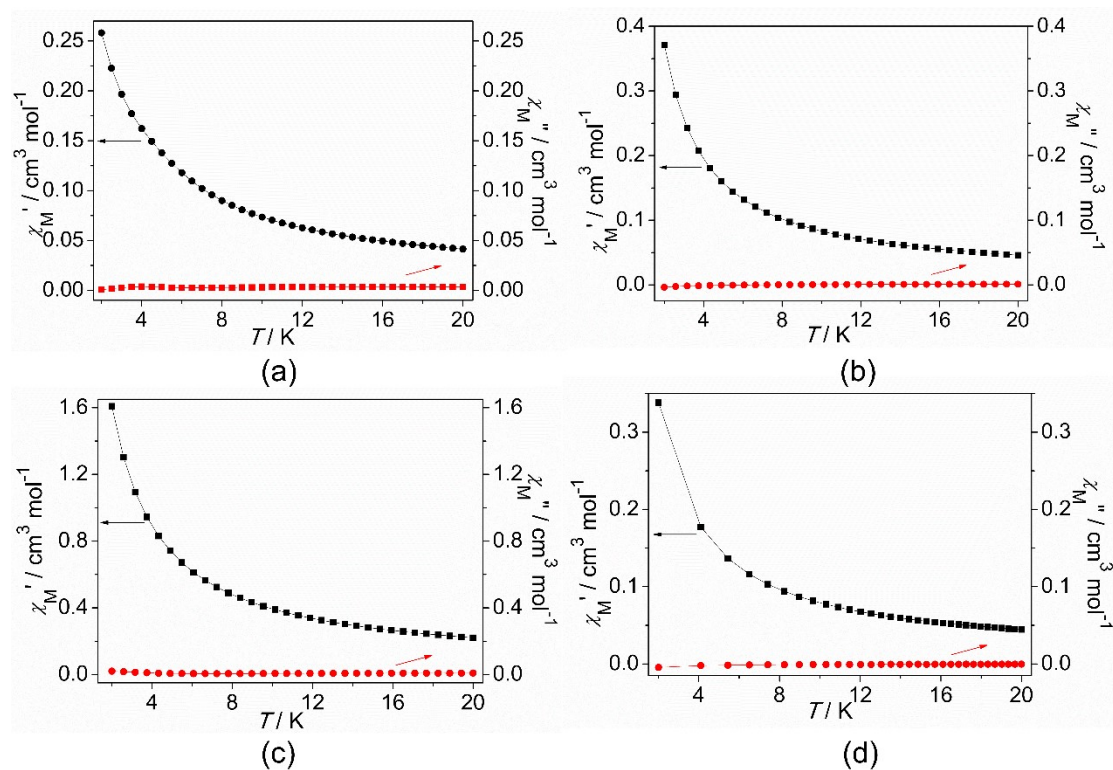

**Fig. S7** Temperature dependence of the in-phase ( $\chi'$ ) and out-phase ( $\chi''$ ) ac magnetic susceptibility at 1000 Hz without static field for **1-4**.

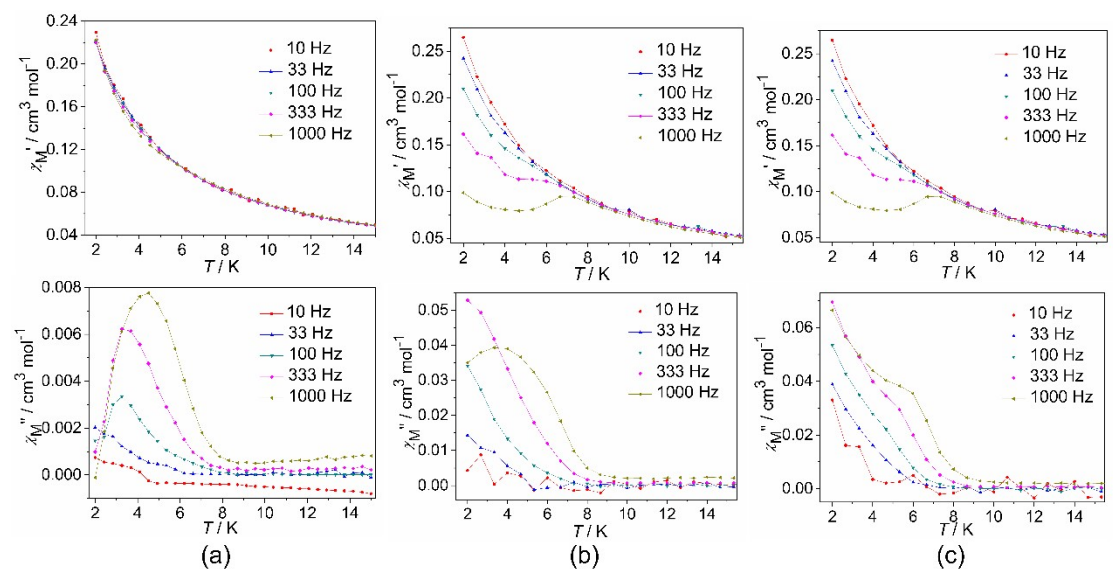

**Fig. S8** Temperature dependence of the in-phase (top) and out-phase (bottom) ac susceptibilities at different frequencies with a dc field of 2000 Oe for complexes **1(a)**, **2(b)** and **4(c)**.

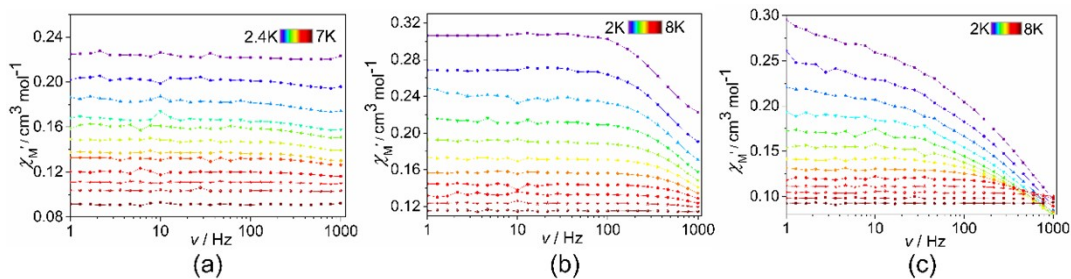

**Fig. S9** Frequency dependence of the in-phase ac susceptibility signals for complexes 1(a), 2(b) and 4(c) under a 2000 Oe dc field.

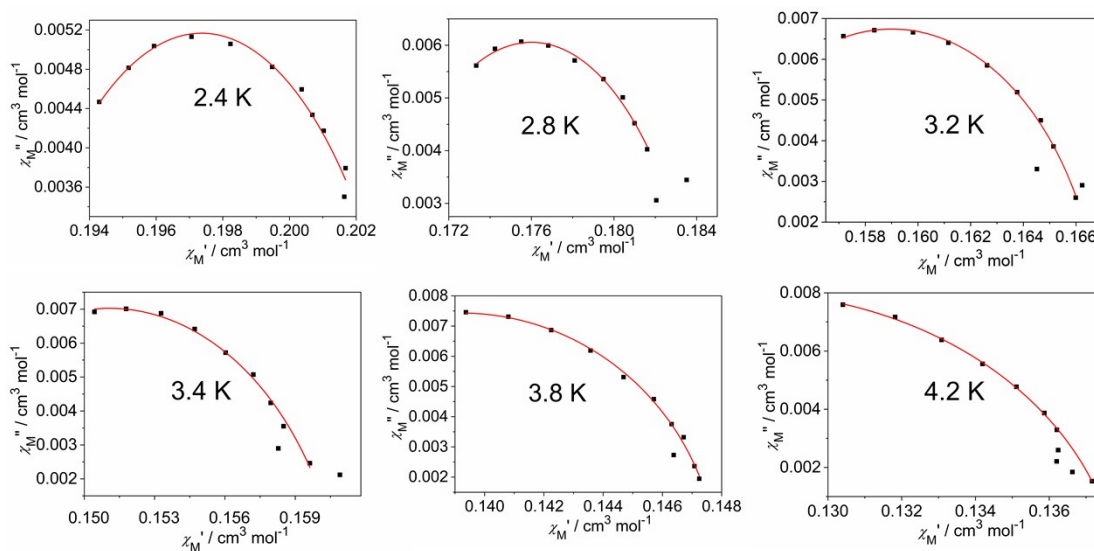

**Fig. S10** Cole-Cole plots under 2000 Oe for 1. The solid lines show the best fitting according to the generalized Debye model.

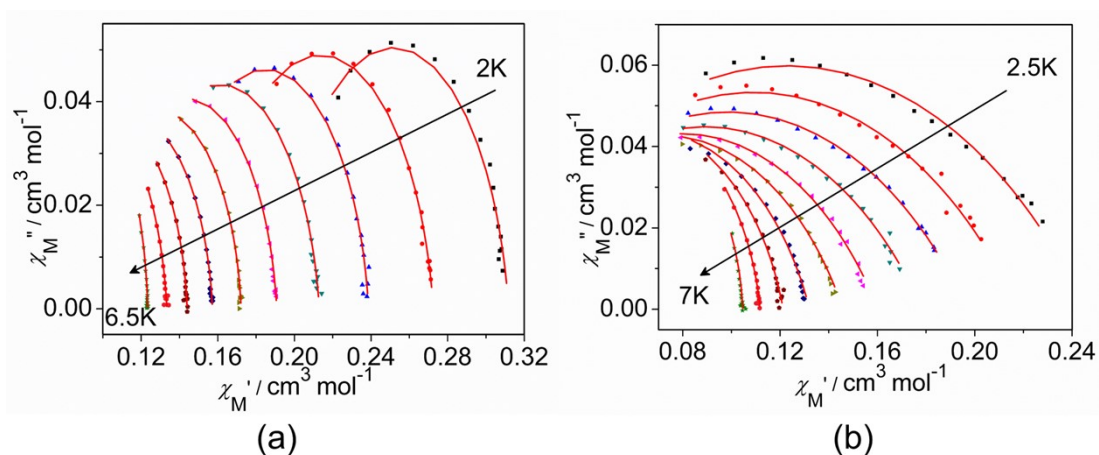

**Fig. S11** Cole-Cole plots under 2000 Oe for 2(a) and 4(b). The solid lines show the best fitting according to the generalized Debye model.

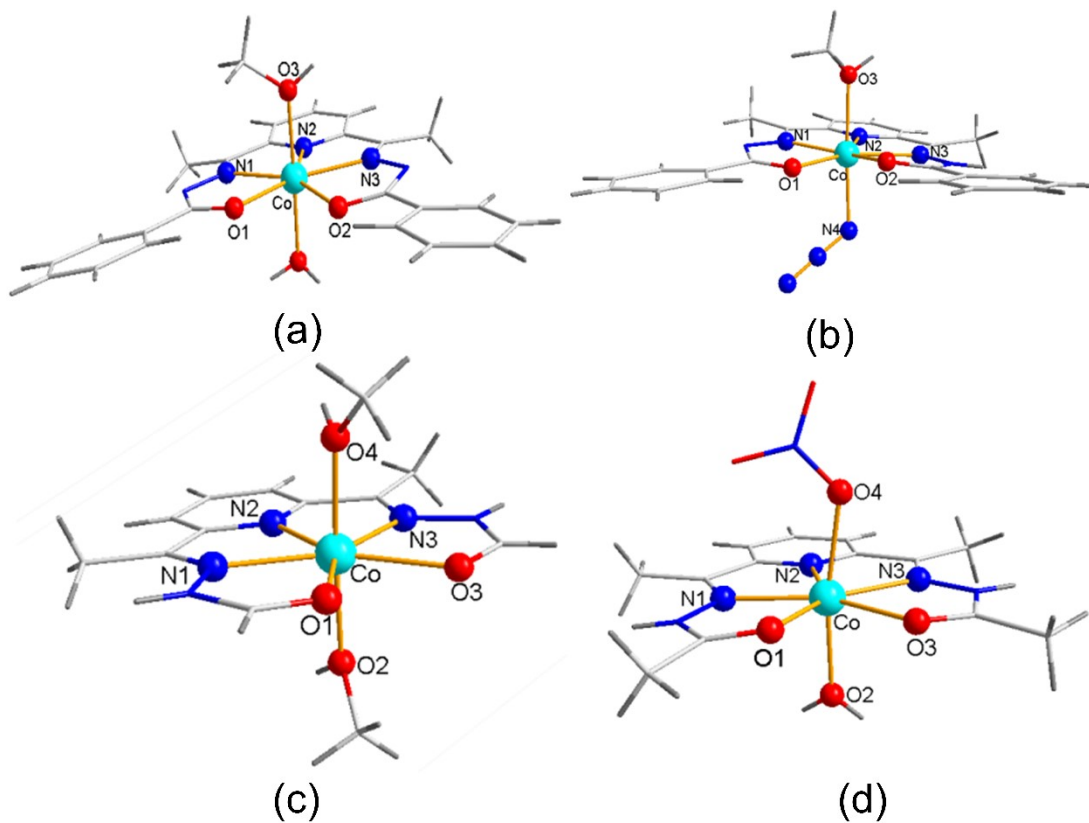

**Fig. S12** Calculated complete structure of complexes 1-4.

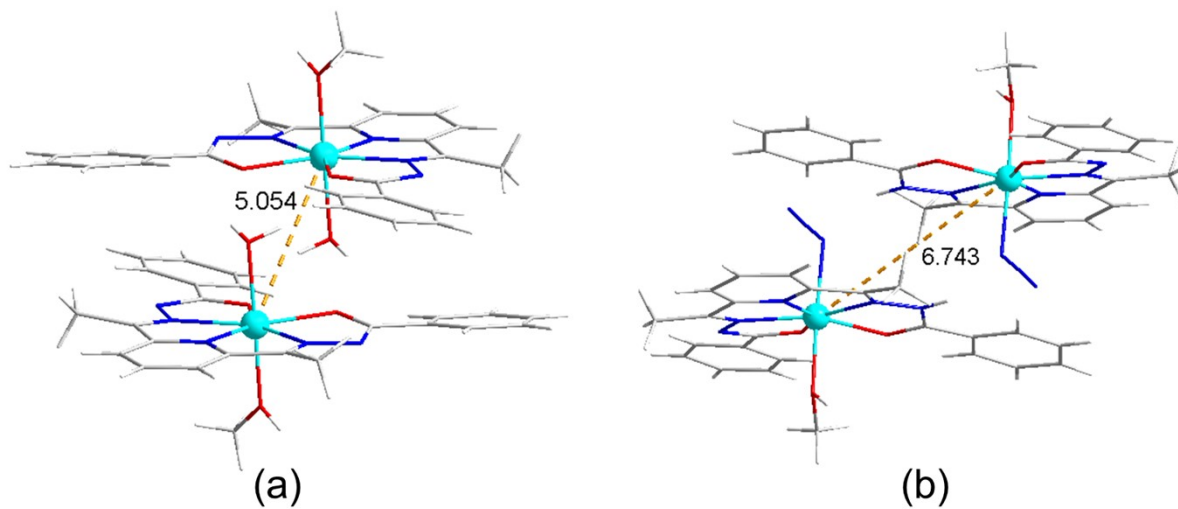

**Fig. S13** The molecular structure for 1 (a) and 2 (b).

## References

1. D. Shao, S.-L. Zhang, L. Shi, Y.-Q. Zhang, and X.-Y. Wang, *Inorg. Chem.*, 2016 **55**, 10859-10869.
2. A. Mondal, A. K. Kharwar, and S. Konar, *Inorg. Chem.* 2019 **58**, 10686-10693.
3. M. Dey, S. Dutta, B. Sarma, R. C. Deba and N. Gogoi, *M. Chem. Commun.*, 2016, **52**, 753-756.
4. X.-C. Huang, C. Zhou, D. Shao, and X.-Y. Wang, *Inorg. Chem.*, 2014 **53**, 12671-12673.
5. B. Drahos̃, R. Herchel and Z., *Inorg. Chem.*, 2017, **56**, 5076–5088.
6. J. Wang, H.-H. Cui, Y.-Q. Zhang, L. Chen and X.-T. Chen, *Polyhedron*, 2018, **154**, 148–155
7. H. Lou, L. Yin, B. Zhang, Z.-W. Ouyang, B. Li and Z. Wang, *Inorg. Chem.*, 2018, **57**, 7757–7762.
